# Supplementary material for: Cyclic Behavior of Retrofitted Low- and High-Strength Concrete Scaled Bridge Piers under Quasistatic Loading
Source: Hindawi journal article supplement (doi:10.1155/2022/2141485), 2022-09-19
Supplement: f1 [file 2141485.f1.pdf]

Appendix- ACalculation Notes

## Step-1

The experimental data was recorded for Lateral load and Horizontal displacement. These two values were logged in Data cell logger:

1. Load Cell Value      –A

2. Displacement value   –B

## Step-2.

Calibration of the Load Cell was done and calibrations equation were developed. The Load value in Kg was noted through the calibration equations as given below:

Load Cell value obtained from test      ----- Say A

Used equation:  $(47499 \times A) + 4432$       ----- Say M

Load Calculation:  $M - (-206.61)$       ----- Say N

Load Value in kgs                              ----- N

## Step-3.

Displacement Value was noted in mm      ----- Say B

## Step-4.

Graph were plotted between N & B on Igor Pro to draw hysteresis Loops with the values in Kgs for Lateral Load and mm for Lateral displacement.

## Step-5.

The Kgs were converted into Kips by using Conversion factor:

$$1 \text{ Kg} = 0.0022046226 \text{ Kip}$$

The Displacement-B was defined in terms of the percentage of the pier height as percentage drift and was used in further analysis and development of graphs.

## Step-6.

The load applied for each drift level was applied in three cycles. When the data collected was plotted each hysteresis Loop had three graphs, one for each cycle for a level of drift i.e. 0.1 %, 0.25%, 0.5%, 1%, 2%, 3%, 4% and 5%. From these loops with maximum values on both Positive and negative sides were picked. All of the hysteresis Loops for one experiment were combined in one graph and drawn at same scale.

## Step-7.

The peak values of these curves were noted and backbone curves were drawn from these values. These backbone curves were exported from IGOR-PRO to Auto Cad files with the same scale.

## Step-8.

This area under the curve calculated through AutoCAD software gave the Energy actually dissipated against each drift level. (Sample Drawing file is attached as figure-a)

Step-9.

Equivalent Stiffness ( $K_e$ ) was calculated using Kawashima K. relation:

$$K_e = \frac{P_{max} - P_{min}}{U_{max} - U_{min}}$$

Where as

$P_{max}$  = Push Force;  $P_{min}$  = Pull Force;  $U_{max}$  = Push Displacement;  $U_{min}$  = Pull Displacement

Step-10.

Equivalent Damping was calculated using Kawashima K. relation:

$$\zeta = \frac{\Delta W}{2\pi W}$$

where as

$$W = \frac{K_e}{2} (U_{max}^2 + U_{min}^2)$$

$W$  = Strain Energy input to the system;  $K_e$  = Equivalent Stiffness;  $U_{max}$  = Push Displacement;  $U_{min}$  = Pull Displacement; and  $\Delta W$  = Energy Dissipated in a Hysteresis loop

## Appendix- B

## Energy Dissipation at each Drift Value DRM-SL

Auto generated graph from Igor was exported to Autocad for area calculation under the curve. The scale in Igor was compared to that of autocad and the following calculation sheet was arranged.

| Drift Value | Area under the curve on ACAD |           | Scale Conversion (X-axis)             | 1mm drift in Experiment = mm in Acad drawing | Scale Conversion for Y-axis | 1mm on Acad is 54.045 kg load in Experiment | Strain Energy with units (kg.mm)               | Strain Energy (Kip. In) |
|-------------|------------------------------|-----------|---------------------------------------|----------------------------------------------|-----------------------------|---------------------------------------------|------------------------------------------------|-------------------------|
| 0.10%       | Area 1                       | 21.7104   | 87.25mm on autocad=50mm on Igor graph | 1.745                                        | 37mm in autocad = 2000kg    | 54.054054                                   | 672.5129714                                    | 0.058249                |
|             | Area 2                       | 1.7338    | do                                    | 1.745                                        | do                          | 54.054054                                   | 53.70711686                                    | 0.0046518               |
|             | Area 3                       | 28.4719   | do                                    | 1.745                                        | do                          | 54.054054                                   | 881.9608147                                    | 0.0763902               |
|             | Area 4                       |           | do                                    | 1.745                                        | do                          | 54.054054                                   | 0                                              | 0                       |
|             |                              |           |                                       |                                              |                             |                                             | <b>Total Strain Energy absorbed/dissipated</b> | <b>0.139291</b>         |
| 0.25%       | Area 1                       | 126.75    | 87.25mm on autocad=50mm on Igor graph | 1.745                                        | 37mm in autocad = 2000kg    | 54.054054                                   | 3926.275846                                    | 0.3400705               |
|             | Area 2                       | 5.048     | do                                    | 1.745                                        | do                          | 54.054054                                   | 156.3695501                                    | 0.0135438               |
|             | Area 3                       | 122.7305  | do                                    | 1.745                                        | do                          | 54.054054                                   | 3801.765663                                    | 0.3292861               |
|             | Area 4                       | 0.4597    | do                                    | 1.745                                        | do                          | 54.054054                                   | 14.23991327                                    | 0.0012334               |
|             |                              |           |                                       |                                              |                             |                                             | <b>Total Strain Energy absorbed/dissipated</b> | <b>0.6841338</b>        |
| 0.50%       | Area 1                       | 531.3499  | 87.25mm on autocad=50mm on Igor graph | 1.745                                        | 37mm in autocad = 2000kg    | 54.054054                                   | 16459.37892                                    | 1.4256126               |
|             | Area 2                       | 16.03     | do                                    | 1.745                                        | do                          | 54.054054                                   | 496.5538605                                    | 0.0430085               |
|             | Area 3                       | 615.1055  | do                                    | 1.745                                        | do                          | 54.054054                                   | 19053.83722                                    | 1.6503291               |
|             | Area 4                       | 0.8671    | do                                    | 1.745                                        | do                          | 54.054054                                   | 26.85975374                                    | 0.0023264               |
|             |                              |           |                                       |                                              |                             |                                             | <b>Total Strain Energy absorbed/dissipated</b> | <b>3.1212766</b>        |
| 1.00%       | Area 1                       | 1171.6038 | 87.25mm on autocad=50mm on Igor graph | 1.745                                        | 37mm in autocad = 2000kg    | 54.054054                                   | 36292.22644                                    | 3.1434149               |
|             | Area 2                       | 28.8735   | do                                    | 1.745                                        | do                          | 54.054054                                   | 894.4009912                                    | 0.0774676               |

|       |        |           |                                       |       |                          |           |                                                 |                  |
|-------|--------|-----------|---------------------------------------|-------|--------------------------|-----------|-------------------------------------------------|------------------|
|       | Area 3 | 1350.3867 | do                                    | 1.745 | do                       | 54.054054 | 41830.30125                                     | 3.6230897        |
|       | Area 4 | 2.35      | do                                    | 1.745 | do                       | 54.054054 | 72.7948579                                      | 0.0063051        |
|       |        |           |                                       |       |                          |           | <b>Total Strain Energy absorbed/dissipated</b>  | <b>6.8502773</b> |
| 2.00% | Area 1 | 3327.3884 | mm=87.25n                             | 1.745 | 37mm in autocad = 2000kg | 54.054054 | 103070.9641                                     | 8.9273885        |
|       | Area 2 | 226.0865  | mm=87.25n                             | 1.745 | do                       | 54.054054 | 7003.376442                                     | 0.6065904        |
|       | Area 3 | 4046.5003 | mm=87.25n                             | 1.745 | do                       | 54.054054 | 125346.5593                                     | 10.856767        |
|       | Area 4 | 97.8127   | mm=87.25n                             | 1.745 | do                       | 54.054054 | 3029.898552                                     | 0.2624316        |
|       |        |           |                                       |       |                          |           | <b>Total Strain Energy absorbed/dissipated</b>  | <b>20.653177</b> |
| 3.00% | Area 1 | 5279.9086 | 87.25mm on autocad=50mm on Igor graph | 1.745 | 37mm in autocad = 2000kg | 54.054054 | 163553.275                                      | 14.166003        |
|       | Area 2 | 703.4785  | do                                    | 1.745 | do                       | 54.054054 | 21791.32657                                     | 1.887434         |
|       | Area 3 | 6072.7023 | do                                    | 1.745 | do                       | 54.054054 | 188111.277                                      | 16.29307         |
|       | Area 4 | 511.499   | do                                    | 1.745 | do                       | 54.054054 | 15844.46682                                     | 1.3723526        |
|       |        |           |                                       |       |                          |           | <b>Total Strain Energy absorbed /dissipated</b> | <b>33.71886</b>  |
| 4.00% | Area 1 | 7088.12   | 87.25mm on autocad=50mm on Igor graph | 1.745 | 37mm in autocad = 2000kg | 54.054054 | 219565.3992                                     | 19.017437        |
|       | Area 2 | 1402.7357 | do                                    | 1.745 | do                       | 54.054054 | 43451.89189                                     | 3.7635422        |
|       | Area 3 | 7843.1693 | do                                    | 1.745 | do                       | 54.054054 | 242954.2105                                     | 21.043236        |
|       | Area 4 | 1351.7505 | do                                    | 1.745 | do                       | 54.054054 | 41872.54705                                     | 3.6267488        |
|       |        |           |                                       |       |                          |           | <b>Total Strain Energy absorbed/dissipated</b>  | <b>47.450964</b> |
| 5.00% | Area 1 | 8925.14   | 87.25mm on autocad=50mm on Igor graph | 1.745 | 37mm in autocad = 2000kg | 54.054054 | 276469.914                                      | 23.946165        |
|       | Area 2 | 2276.2058 | do                                    | 1.745 | do                       | 54.054054 | 70508.96926                                     | 6.1070639        |
|       | Area 3 | 8787.284  | do                                    | 1.745 | do                       | 54.054054 | 272199.6128                                     | 23.576297        |
|       | Area 4 | 2424.3466 | do                                    | 1.745 | do                       | 54.054054 | 75097.85797                                     | 6.5045259        |
|       |        |           |                                       |       |                          |           | <b>Total Strain Energy absorbed/dissipated</b>  | <b>60.134052</b> |

## Appendix- C

**EQUIVALENT STIFFNESS OF CONTROL MODELS (6192 PSI)**

| Drift Level | Nominal Lateral Displacement | Nominal Lateral Displacement | Pull Force               | Push Force               | Pull Displacement | Push Displacement | Equivalent Stiffness |
|-------------|------------------------------|------------------------------|--------------------------|--------------------------|-------------------|-------------------|----------------------|
|             |                              |                              | P <sub>min</sub> (South) | P <sub>max</sub> (North) | μ <sub>min</sub>  | μ <sub>max</sub>  |                      |
| %           | (mm)                         | (in)                         | (kips)                   | (kips)                   | (in)              | (in)              | (kips-in)            |
| 0.10%       | 1.92                         | 0.076                        | -1.485                   | 1.707                    | -0.079            | 0.079             | 20.196               |
| 0.25%       | 4.8                          | 0.189                        | -3.086                   | 2.620                    | -0.192            | 0.191             | 14.908               |
| 0.50%       | 9.6                          | 0.378                        | -5.289                   | 3.542                    | -0.382            | 0.390             | 11.440               |
| 1.00%       | 19.2                         | 0.756                        | -7.462                   | 5.376                    | -0.758            | 0.760             | 8.455                |
| 2.00%       | 38.4                         | 1.512                        | -9.517                   | 6.323                    | -1.516            | 1.541             | 5.182                |
| 3.00%       | 57.6                         | 2.268                        | -9.415                   | 5.729                    | -2.271            | 2.272             | 3.333                |
| 4.00%       | 76.8                         | 3.024                        | -8.701                   | 4.429                    | -3.084            | 3.031             | 2.147                |
| 5.00%       | 96                           | 3.780                        | -19.417                  |                          |                   |                   |                      |

**EQUIVALENT STIFNESS OF UNDAMAGED RETOFITTED MODELS - DOUBLE LAYERED CFRP (6192 PSI) UDRM-DL**

| Drift Level | Nominal Lateral Displacement | Nominal Lateral Displacement | Pull Force               | Push Force               | Pull Displacement | Push Displacement | Equivalent Stiffness |
|-------------|------------------------------|------------------------------|--------------------------|--------------------------|-------------------|-------------------|----------------------|
|             |                              |                              | P <sub>min</sub> (South) | P <sub>max</sub> (North) | μ <sub>min</sub>  | μ <sub>max</sub>  |                      |
| %           | (mm)                         | (in)                         | (kips)                   | (kips)                   | (in)              | (in)              | (kips-in)            |
| 0.10        | 1.92                         | 0.076                        | -2.064                   | 1.510                    | -0.079            | 0.078             | 22.839               |
| 0.25        | 4.8                          | 0.189                        | -4.020                   | 2.383                    | -0.191            | 0.192             | 16.703               |
| 0.50        | 9.6                          | 0.378                        | -6.012                   | 4.634                    | -0.382            | 0.470             | 12.502               |
| 1.00        | 19.2                         | 0.756                        | -8.182                   | 6.568                    | -0.759            | 0.759             | 9.716                |
| 2.00        | 38.4                         | 1.512                        | -8.624                   | 7.596                    | -1.517            | 1.524             | 5.334                |
| 3.00        | 57.6                         | 2.268                        | -8.507                   | 7.521                    | -2.269            | 2.276             | 3.526                |
| 4.00        | 76.8                         | 3.024                        | -11.246                  | 7.104                    | -3.031            | 3.054             | 3.016                |
| 5.00        | 96                           | 3.780                        |                          |                          |                   |                   |                      |

**EQUIVALENT STIFNESS OF UNDAMAGED RETOFITTED MODELS - SINGLE LAYERED CFRP (6192 PSI) UDRL-SL**

| Drift Level | Nominal Lateral Displacement | Nominal Lateral Displacement | Pull Force               | Push Force               | Pull Displacement | Push Displacement | Equivalent Stiffness |
|-------------|------------------------------|------------------------------|--------------------------|--------------------------|-------------------|-------------------|----------------------|
|             |                              |                              | P <sub>min</sub> (South) | P <sub>max</sub> (North) | μ <sub>min</sub>  | μ <sub>max</sub>  |                      |
| %           | (mm)                         | (in)                         | (kips)                   | (kips)                   | (in)              | (in)              | (kips-in)            |
| 0.10        | 1.92                         | 0.076                        | -1.587                   | 1.345                    | -0.079            | 0.078             | 18.739               |
| 0.25        | 4.8                          | 0.189                        | -3.089                   | 2.863                    | -0.191            | 0.192             | 15.525               |
| 0.50        | 9.6                          | 0.378                        | -4.970                   | 4.213                    | -0.382            | 0.470             | 10.784               |
| 1.00        | 19.2                         | 0.756                        | -7.413                   | 6.361                    | -0.759            | 0.759             | 9.074                |
| 2.00        | 38.4                         | 1.512                        | -9.866                   | 7.799                    | -1.517            | 1.524             | 5.809                |
| 3.00        | 57.6                         | 2.268                        | -8.659                   | 7.702                    | -2.269            | 2.276             | 3.600                |
| 4.00        | 76.8                         | 3.024                        | -7.453                   | 6.734                    | -3.031            | 3.054             | 2.332                |
| 5.00        | 96                           | 3.780                        | -13.001                  |                          |                   |                   |                      |

**EQUIVALENT STIFNESS OF DAMAGED RETOFITTED MODELS - DOUBLE LAYERED CFRP (6192 PSI) DRM-DL**

| Drift Level | Nominal Lateral Displacement | Nominal Lateral Displacement | Pull Force               | Push Force               | Pull Displacement | Push Displacement | Equivalent Stiffness |
|-------------|------------------------------|------------------------------|--------------------------|--------------------------|-------------------|-------------------|----------------------|
|             |                              |                              | P <sub>min</sub> (South) | P <sub>max</sub> (North) | μ <sub>min</sub>  | μ <sub>max</sub>  |                      |
| %           | (mm)                         | (in)                         | (kips)                   | (kips)                   | (in)              | (in)              | (kips-in)            |
| 0.10        | 1.92                         | 0.076                        | -1.517                   | 0.860                    | -0.077            | 0.087             | 14.552               |
| 0.25        | 4.8                          | 0.189                        | -2.893                   | 1.805                    | -0.191            | 0.190             | 12.327               |
| 0.50        | 9.6                          | 0.378                        | -5.081                   | 3.351                    | -0.381            | 0.379             | 11.089               |
| 1.00        | 19.2                         | 0.756                        | -8.145                   | 4.994                    | -0.758            | 0.757             | 8.675                |
| 2.00        | 38.4                         | 1.512                        | -10.600                  | 6.669                    | -1.514            | 1.542             | 5.652                |
| 3.00        | 57.6                         | 2.268                        | -10.614                  | 6.467                    | -2.271            | 2.276             | 3.756                |
| 4.00        | 76.8                         | 3.024                        | -9.704                   | 5.533                    | -3.025            | 3.039             | 2.512                |
| 5.00        | 96                           | 3.780                        |                          |                          |                   |                   |                      |

**EQUIVALENT STIFNESS OF DAMAGED RETOFITTED MODELS - SINGLE LAYERED CFRP (6192 PSI) DRM-SL**

| Drift Level | Nominal Lateral Displacement | Nominal Lateral Displacement | Pull Force               | Push Force               | Pull Displacement | Push Displacement | Equivalent Stiffness |
|-------------|------------------------------|------------------------------|--------------------------|--------------------------|-------------------|-------------------|----------------------|
|             |                              |                              | P <sub>min</sub> (South) | P <sub>max</sub> (North) | μ <sub>min</sub>  | μ <sub>max</sub>  |                      |
| %           | (mm)                         | (in)                         | (kips)                   | (kips)                   | (in)              | (in)              | (kips-in)            |
| 0.10        | 1.92                         | 0.076                        | -1.537                   | 1.197                    | -0.077            | 0.087             | 16.736               |
| 0.25        | 4.8                          | 0.189                        | -2.893                   | 2.874                    | -0.191            | 0.190             | 15.133               |
| 0.50        | 9.6                          | 0.378                        | -4.994                   | 4.620                    | -0.381            | 0.379             | 12.645               |
| 1.00        | 19.2                         | 0.756                        | -7.722                   | 6.894                    | -0.758            | 0.757             | 9.650                |
| 2.00        | 38.4                         | 1.512                        | -9.640                   | 8.671                    | -1.514            | 1.542             | 5.993                |
| 3.00        | 57.6                         | 2.268                        | -9.419                   | 8.728                    | -2.271            | 2.276             | 3.991                |
| 4.00        | 76.8                         | 3.024                        | -9.136                   | 8.396                    | -3.025            | 3.039             | 2.891                |
| 5.00        | 96                           | 3.780                        |                          |                          |                   |                   |                      |

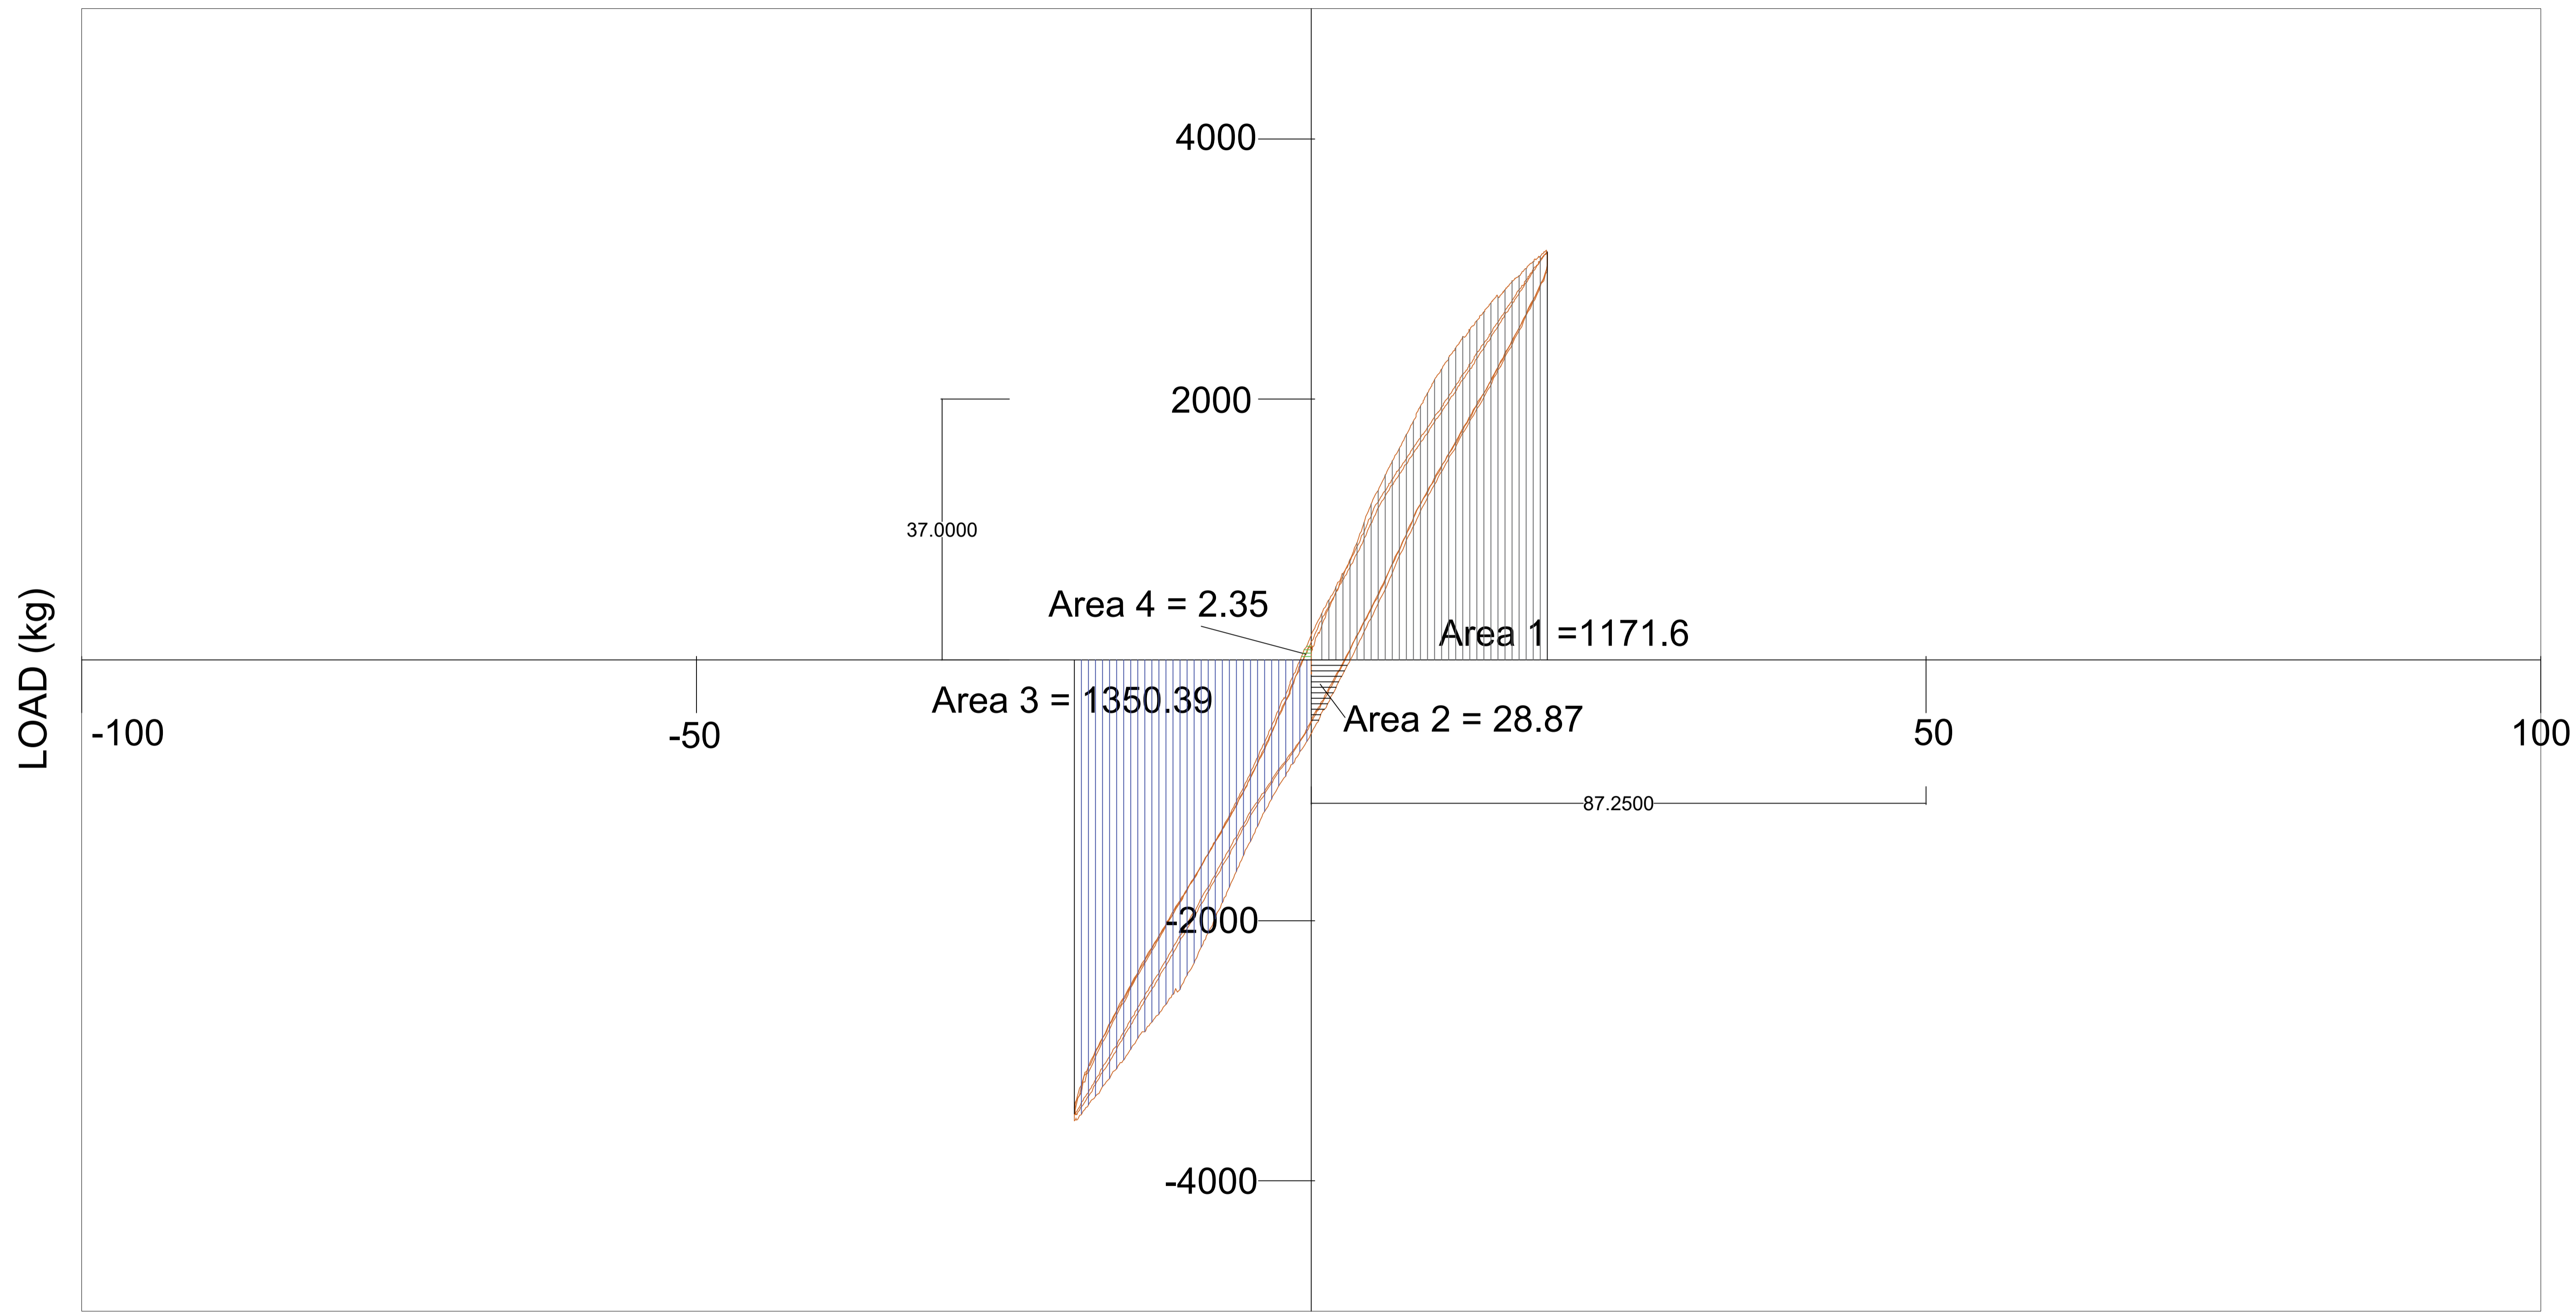

1%\_DRIFT  
DRM-SL

DRIFT (mm)

GRAPH-1
